# Supplementary material
Source: PubMed Central journal article supplement (PMC3659994)
Supplement: supp_2012.075184_2012_075184-Contributions.pdf [file supp_2012.075184_2012_075184-Contributions.pdf]

**Manuscript no. HAEMATOL/2012/075184 entitled “Everolimus in combination with rituximab induces complete responses in heavily pretreated diffuse large B-cell lymphoma”**

**Authors: Jeffrey Barnes, Eric Jacobsen, Yang Feng, Arnold Freedman, Ephraim Hochberg, Ann LaCasce, Philippe Armand, Robin Joyce, Aliyah Sohani, Scott Rodig, Donna Neuberg, David Fisher, and Jeremy Abramson**

**Information about the contributions of each person named as having participated in the study**

**1) Guarantor(s), i.e., person(s) who is (are) responsible for the integrity of the work as a whole:** • Jeffrey Barnes, Massachusetts General Hospital Cancer Center. jabarnes@partners.org

According to the International Committee of Medical Journal Editors (ICMJE) ([http://www.icmje.org/ethical\\_1author.html](http://www.icmje.org/ethical_1author.html)): “Authorship credit should be based on: 1) substantial contributions to conception and design, acquisition of data, or analysis and interpretation of data; 2) drafting the article or revising it critically for important intellectual content; and 3) final approval of the version to be published. Authors should meet conditions 1, 2, and 3 ..... Acquisition of funding, collection of data, or general supervision of the research group alone does not constitute authorship”.

**The guarantors of this manuscript confirm that all persons designated as authors qualify for authorship, and that each author has participated sufficiently in the work to take public responsibility for appropriate portions of the content.**

**2) Authors who participated in the conception of the study:**  
• Jeffrey Barnes and Jeremy Abramson

**3) Design & Methods. The following authors were responsible for specific investigations (please detail):**

• Jeffrey Barnes, Jeremy Abramson, Yang Feng, and Donna Neuberg were responsible for design of the study and statistical plan

**4) Results. The following authors were responsible for specific portions of the results, including figures and tables (please indicate the person responsible for each figure and each table):**

- All figures and tables were created by Jeffery Barnes
- Yang Feng and Donna Neuburg provided statistical support and survival curves
- Aliyah Sohani and Scot Rodig performed pathologic analysis of all specimens
- All other authors recruited patients and contributed data to the results

**5) Writing the manuscript. The following authors were responsible for writing the manuscript:**

- Jeffery Barnes and Jeremy Abramson were primarily responsible for drafting the manuscript
- All authors edited the manuscript and provided additions

**6) Contributors Listed in Acknowledgments:** None aside from funding documented in the manuscript
